# Supplementary material for: Effect of cycling conditions on hydride stability of the Ti 11 Nb 61 Cr 28 alloy
Source: Royal Society of Chemistry journal article supplement (doi:10.1039/d5ta08865h), 2026-01-01
Supplement: d5ta08865h1.pdf [file d5ta08865h1.pdf]

## SUPPLEMENTARY INFORMATION

### Effect of cycling conditions on hydride stability of the $\text{Ti}_{11}\text{Nb}_{61}\text{Cr}_{28}$ alloy

Gabriela C. Mayer<sup>1</sup>, Bruno Hessel Silva<sup>2</sup>, Walter José Botta<sup>1,3</sup>, Guilherme Zepon<sup>1,3\*</sup>

1. Graduate Program in Materials Science and Engineering (PPGCEM/UFSCar) - Rodovia Washington Luiz, km 235, Federal University of São Carlos, São Carlos, São Paulo CEP: 13565-905, Brazil

2. Department of Technology Systems, University of Oslo, Gunnar Randers vei 19, Kjeller 2027, Norway

3. Department of Materials Engineering (DEMa/UFSCar) - Rodovia Washington Luiz, km 235, Federal University of São Carlos, São Carlos CEP: 13565-905, Brazil

\*corresponding author: [zepon@ufscar.br](mailto:zepon@ufscar.br)

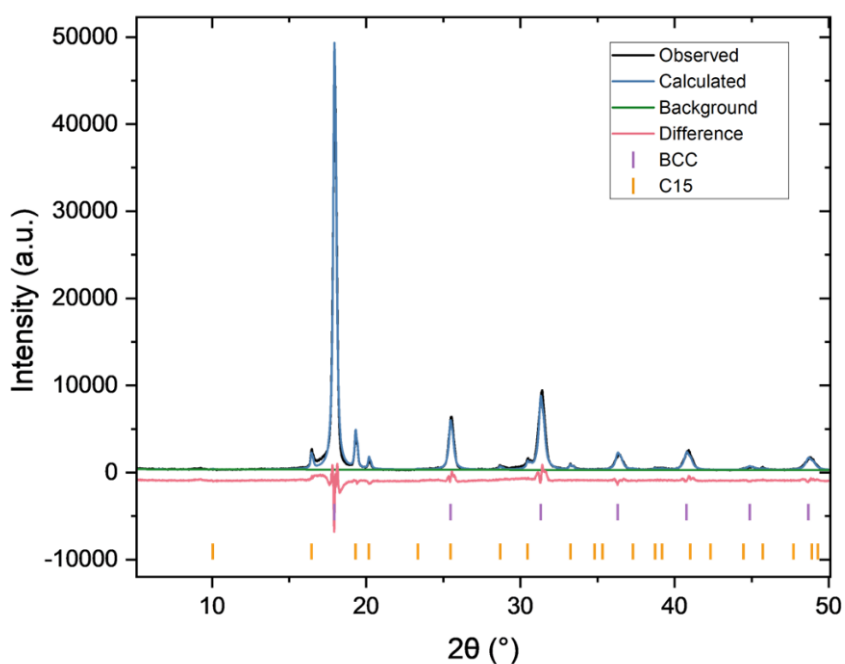

**Figure S1:** Rietveld refinement of the XRD pattern of the as-cast  $\text{Ti}_{11}\text{Nb}_{61}\text{Cr}_{28}$  alloy.

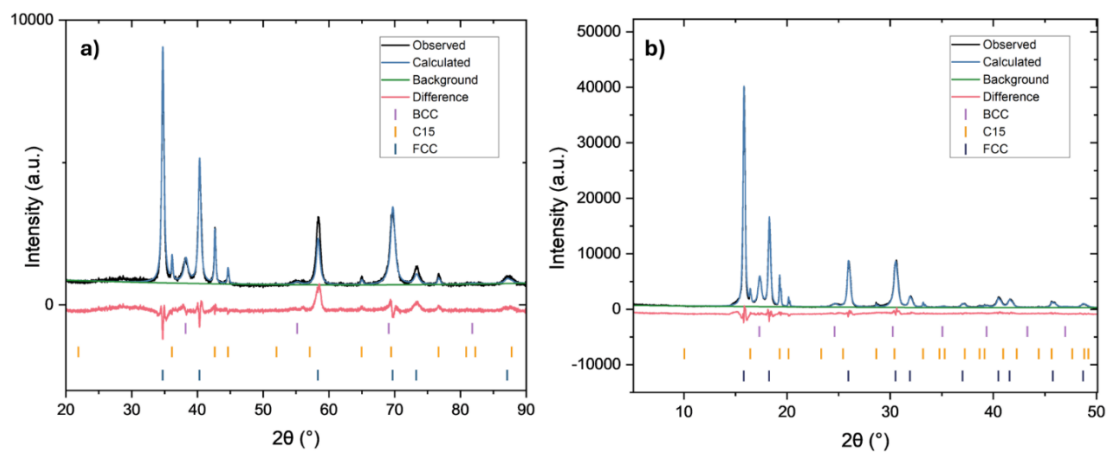

**Figure S2:** Rietveld refinement of the XRD pattern of the first-hydrogenated  $\text{Ti}_{11}\text{Nb}_{61}\text{Cr}_{28}$  alloy, a) 1 day and b) 700 days after hydrogenation.

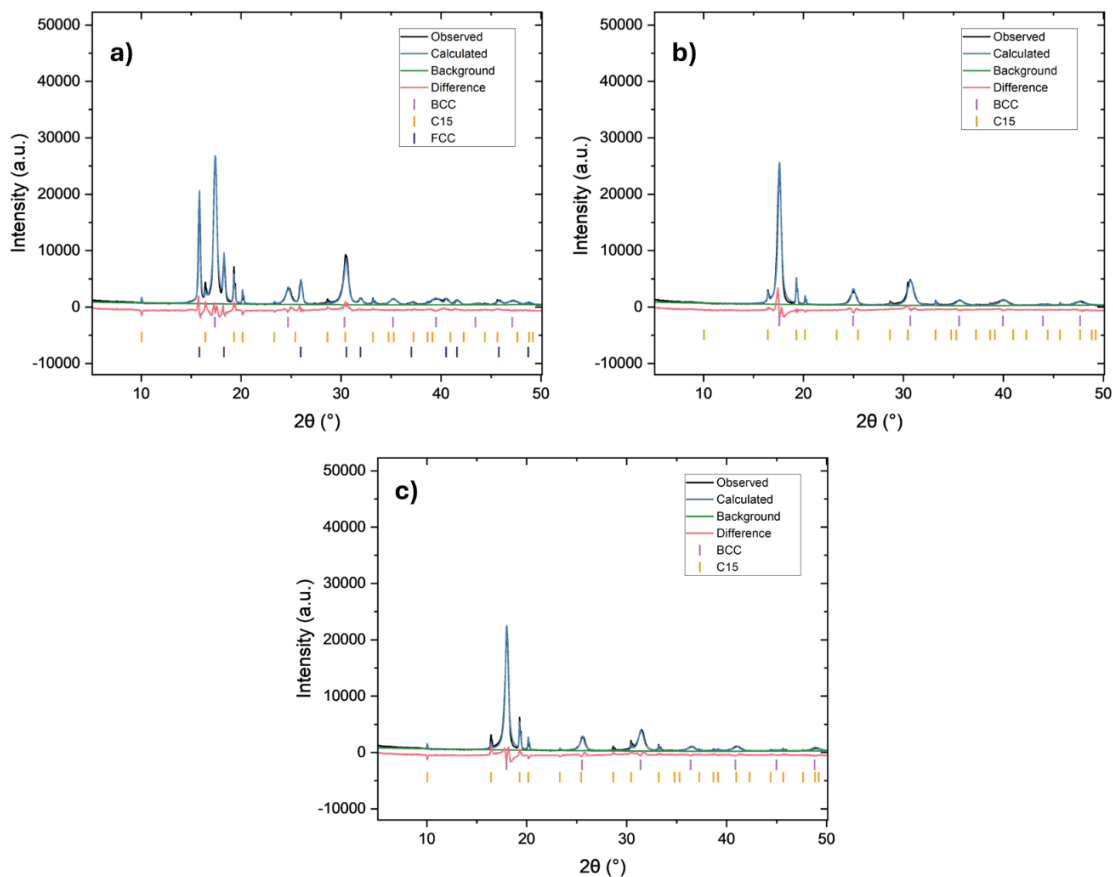

**Figure S3:** Rietveld refinement of the XRD pattern of the  $\text{Ti}_{11}\text{Nb}_{61}\text{Cr}_{28}$  alloy after DSC/TGA measurements up to a) 290 °C, b) 340 °C, and c) 550 °C.

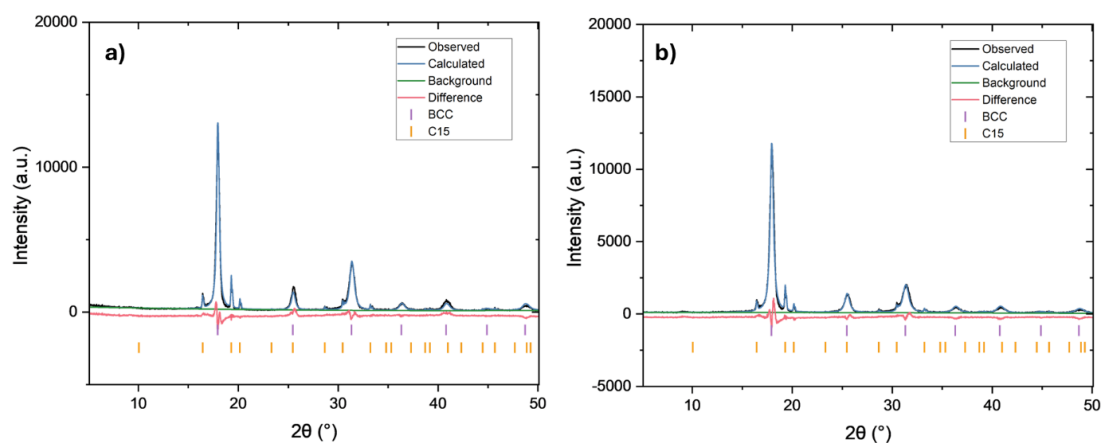

**Figure S4:** Rietveld refinement of the XRD pattern of the  $\text{Ti}_{11}\text{Nb}_{61}\text{Cr}_{28}$  alloy after desorption at 350 °C in the a) 1<sup>st</sup> and b) 10<sup>th</sup> cycles.

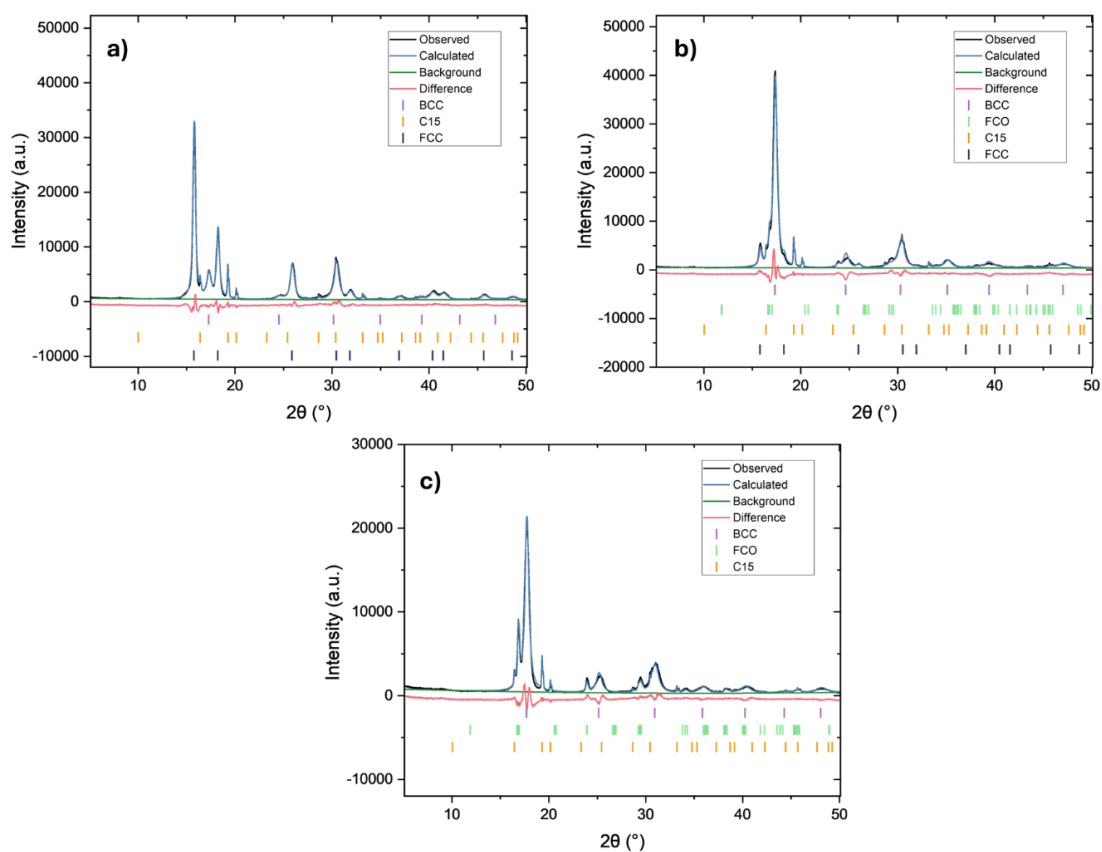

**Figure S5:** Rietveld refinement of the XRD pattern of the hydrogenated  $\text{Ti}_{11}\text{Nb}_{61}\text{Cr}_{28}$  alloy after 10 cycles with absorption at 25 °C and desorption at 350 °C, a) 1 day, b) 120 days, and c) 260 days after hydrogenation.

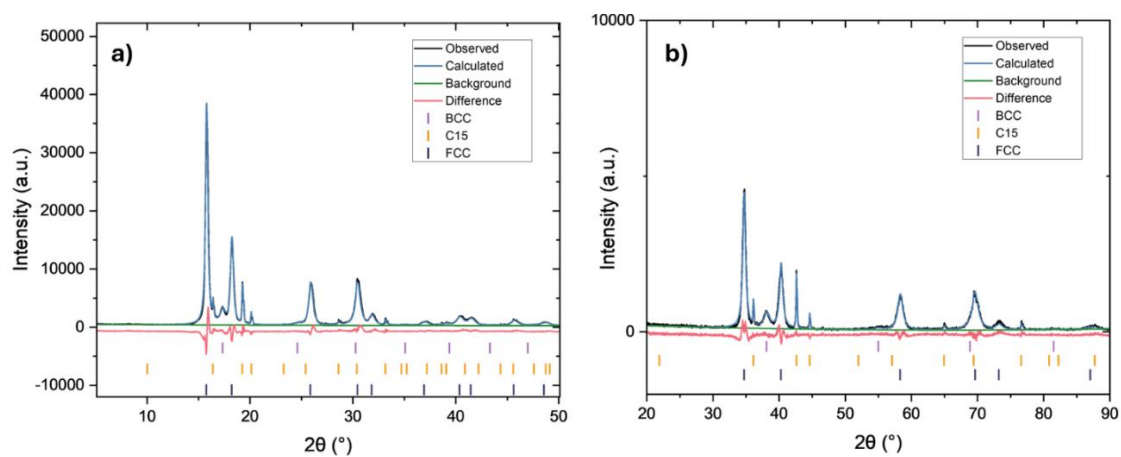

**Figure S6:** Rietveld refinement of the XRD pattern of the hydrogenated  $\text{Ti}_{11}\text{Nb}_{61}\text{Cr}_{28}$  alloy after 20 cycles with absorption and desorption at 25 °C, a) 1 day and b) 120 days after hydrogenation.
